# Supplementary material
Source: publisher figshare collection journal article supplement (https://karger.figshare.com/ndownloader/files/31530599)
Supplement: Supplementary file 1 [file 31530599]

## Supplementary Materials

**Fig. S1**

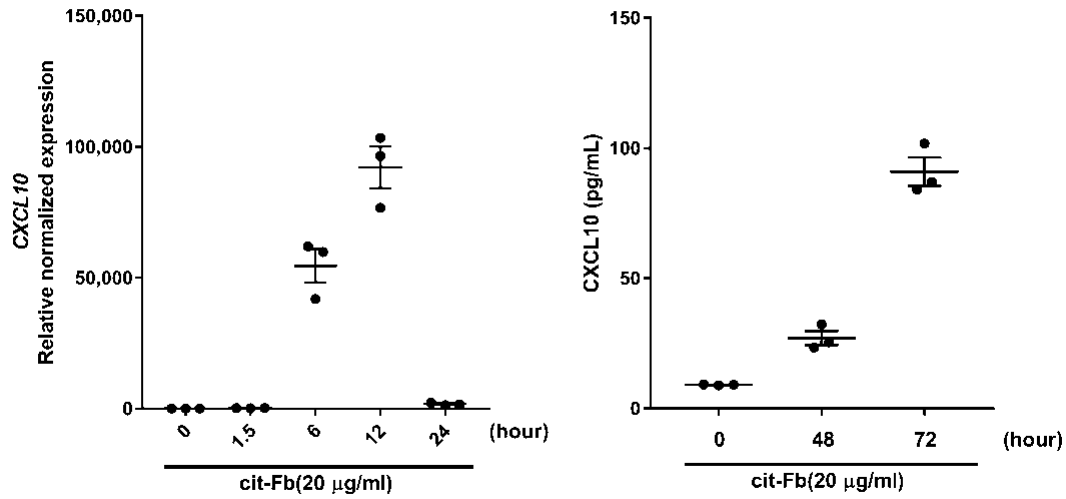

**Fig. S1**

Time course of cit-Fb-mediated CXCL10 gene and protein expression in rheumatoid synovial cells(RSCs). RSCs were cultured with cit-Fb (20  $\mu$ g/mL) time-dependently(0 h, 1.5 h, 6 h, 12 h, 24 h). The treated cells were subjected to qRT-PCR analysis for *CXCL10* . Data are normalized to *ACTB* and presented as mean  $\pm$  SEM (n = 3).

RSCs were cultured with cit-Fb (20  $\mu$ g/mL) time-dependently(0 h, 48 h, 72 h) , and CXCL10 levels in the cultured supernatants were determined by ELISA. Data are presented as mean  $\pm$  SEM (n = 3).

**Fig. S2**

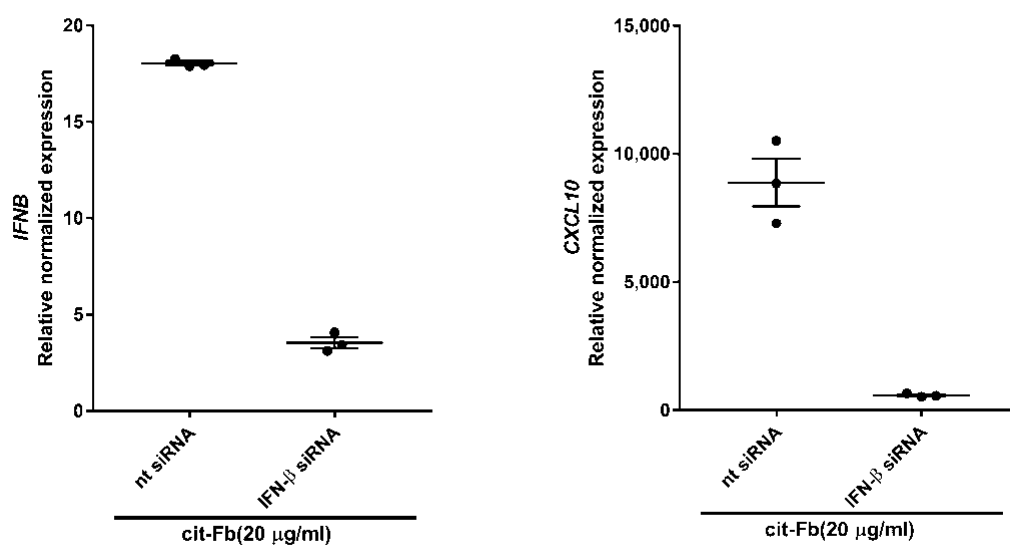

Fig. S2

Induction of CXCL10 by cit-Fb via IFN- $\beta$  in rheumatoid synovial cells(RSCs). RSCs were pre-treated with IFN- $\beta$ -specific siRNA or non-target (nt) siRNA for 48 h, and stimulated with cit-Fb (20  $\mu$ g/mL) for 5 h. The treated cells were subjected to qRT-PCR analysis for *IFNβ* or *CXCL10*. Data are normalized to *ACTB* and presented as mean  $\pm$  SEM (n = 3).

**Fig. S3**

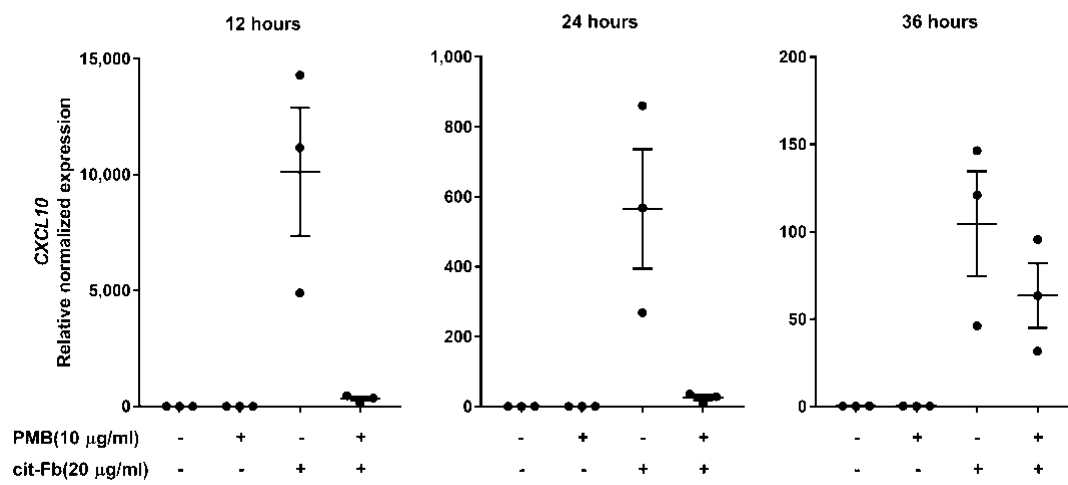

**Fig. S3**

Time dependent effect of cit-Fb and/or polymyxin-B(PMB) in rheumatoid synovial cells(RSCs). RSCs were cultured with cit-Fb (20 µg/mL) and/or PMB (10 µg/mL) for 12 h, 24h, and 36 h. The treated cells were subjected to qRT-PCR analysis for *CXCL10* . Data are normalized to *ACTB* and presented as mean ± SEM (n = 3).

Supplementary Table 1. Quantitative real-time PCR primer sequences for genes used in this study.

| Gene          | Sense                     | Antisense                  |
|---------------|---------------------------|----------------------------|
| <i>IL1B</i>   | 5'-CTAAACAGATGAAGTGCTCC   | 5'-GGTCATTCTCCTGGAAGG      |
| <i>IL1RN</i>  | 5'-ATACTTGCAAGGACCAAATG   | 5'-TGTTAACTGCCTCCAGC       |
| <i>TNFA</i>   | 5'-AGGCAGTCAGATCATCTTC    | 5'-TTATCTCTCAGCTCCACG      |
| <i>IL6</i>    | 5'-GCAGAAAAAGGCAAAGAATC   | 5'-CTACATTTGCCGAAGAGC      |
| <i>IL8</i>    | 5'-GTTTTTGAAGAGGGCTGAG    | 5'-TTTGCTTGAAGTTTCACTGG    |
| <i>CXCL1</i>  | 5'-ATGCTGAACAGTGACAAATC   | 5'-TCTTCTGTTCTATAAGGGC     |
| <i>CXCL5</i>  | 5'-ATTTGTCTTGATCCAGAAGC   | 5'-TCAGTTTTCCTTGTTCCAC     |
| <i>CXCL9</i>  | 5'-AGGTCAGCCAAAAGAAAAAG   | 5'-TGAAGTGGTCTCTTATGTAGTC  |
| <i>CXCL10</i> | 5'-AAAGCAGTTAGCAAGGAAAG   | 5'-TCATTGGTCACCTTTTAGTG    |
| <i>CXCL11</i> | 5'-CTACAGTTGTTCAAGGCTTC   | 5'-CACTTTCCTGCTTTTACCC     |
| <i>CCL2</i>   | 5'-AGACTAACCCAGAAACATCC   | 5'-ATTGATTGCATCTGGCTG      |
| <i>CCL3</i>   | 5'-TCTCTGCAACCAGTTCTC     | 5'-AATTCTGTGGAATCTGCC      |
| <i>CCL4</i>   | 5'-GCCGTGTTATTGTATTAGGT   | 5'-TATGAAAACACACAGAATCAAAT |
| <i>CCL5</i>   | 5'-AAGTCTCTAGGTTCTGAGC    | 5'-TTTTATGGTTGCATTGAGAAC   |
| <i>CCL11</i>  | 5'-GATCTTCAAGACCAAATCTGG  | 5'-CAGAATGCATTGTAAGAAGGG   |
| <i>CCL17</i>  | 5'-TTCCCCTTAGAAAGCTGAAG   | 5'-CTTCACTCTCTTGTTGTTGG    |
| <i>CCL20</i>  | 5'-TATATTGTGCGTCTCCTCAG   | 5'-GCTATGTCCAATTCCATTCC    |
| <i>COX2</i>   | 5'-AAGCAGGCTAATACTGATAGG  | 5'-TGTTGAAAAGTAGTTCTGGG    |
| <i>IFNA</i>   | 5'-ATCTGGTCCAACATGAAAAC   | 5'-GGGTGAGAGTCTTTGAAATG    |
| <i>IFNB</i>   | 5'-ATTCTAACTGCAACCTTTCG   | 5'-GTTGTAGCTCATGGAAAGAG    |
| <i>IFNG</i>   | 5'-GGTAACTGACTTGAATGTCC   | 5'-TTTTCGCTTCCCTGTTTTAG    |
| <i>TLR4</i>   | 5'-GATTTATCCAGGTGTGAAATCC | 5'-TATTAAGGTAGAGAGGTGGC    |
| <i>ACTB</i>   | 5'-GACGACATGGAGAAAATCTG   | 5'-ATGATCTGGGTCATCTTCTC    |
